# Supplementary material for: Delivery of rapamycin by biomimetic peptide nanoparticles targeting oxidized low-density lipoprotein in atherosclerotic plaques
Source: Royal Society of Chemistry journal article supplement (doi:10.1039/d4bm00367e), 2024-01-01

## Supporting Information

### **Delivery of Rapamycin by Biomimetic Peptide Nanoparticles Targeting Oxidized Low-Density Lipoprotein in Atherosclerotic Plaques**

*Anqi Wang<sup>1)</sup>, Kai Yue<sup>1,2)</sup>\*, Weishen Zhong<sup>1)</sup>, Genpei Zhang<sup>1)</sup>, Lei Wang<sup>3)</sup>, Hua Zhang<sup>4)</sup>,  
Xinxin Zhang<sup>1,2)</sup>*

*1) School of Energy and Environmental Engineering, University of Science and  
Technology Beijing, Beijing 100083, China*

*2) Shunde Graduate School of University of Science and Technology Beijing, Shunde,  
Guangdong Province, 528399, China*

*3) CAS Key Laboratory for Biomedical Effects of Nanomaterials and Nanosafety,  
National Center for Nanoscience and Technology (NCNST), Beijing 100190, China*

*4) Chinese Academy of Medical Sciences and Peking Union Medical College, Beijing,  
100730, China.*

*\*Corresponding author: yuekai@ustb.edu.cn*

**Figure S1.** Initial configuration of the FRB and RAPA.

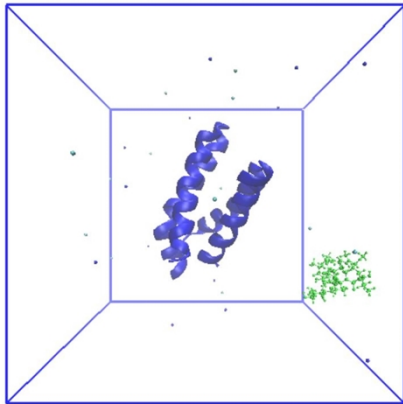

**Figure S2.** Initial configurations of the peptides and RAPA.

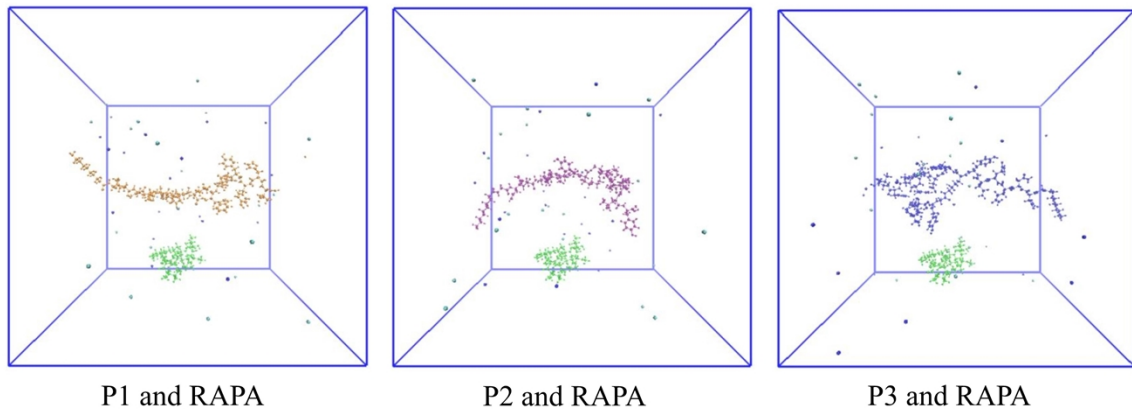

**Figure S3.** Initial configurations of SMD simulations.

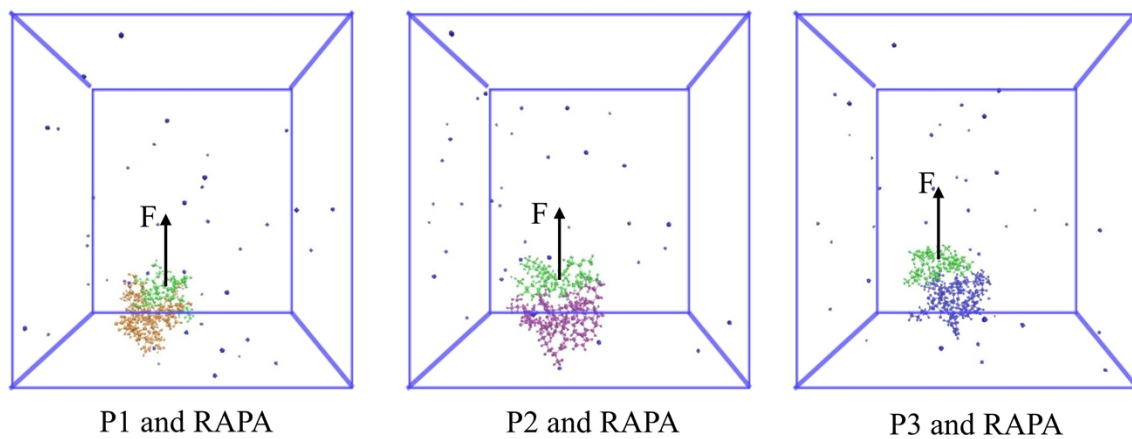

**Figure S4.** HPLC profile and MS analysis of P1.

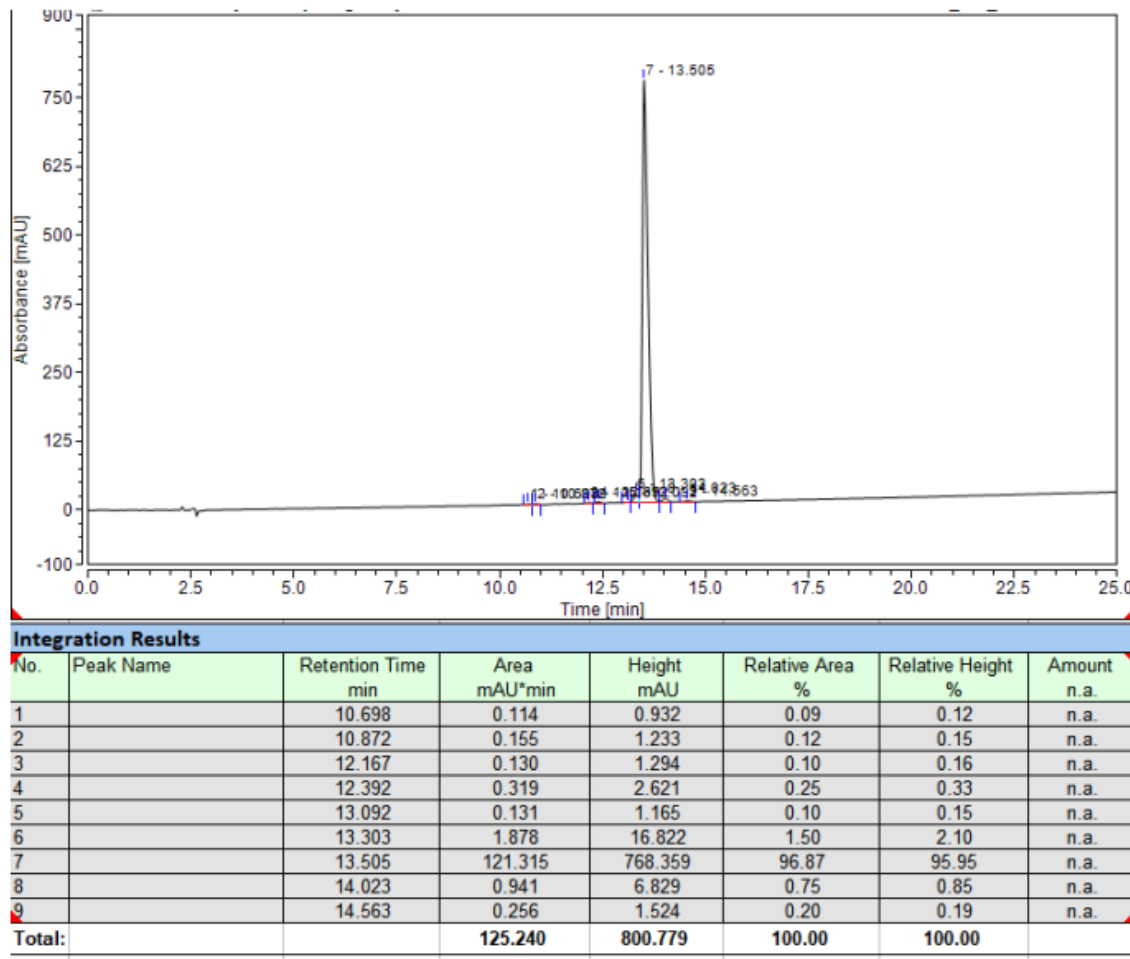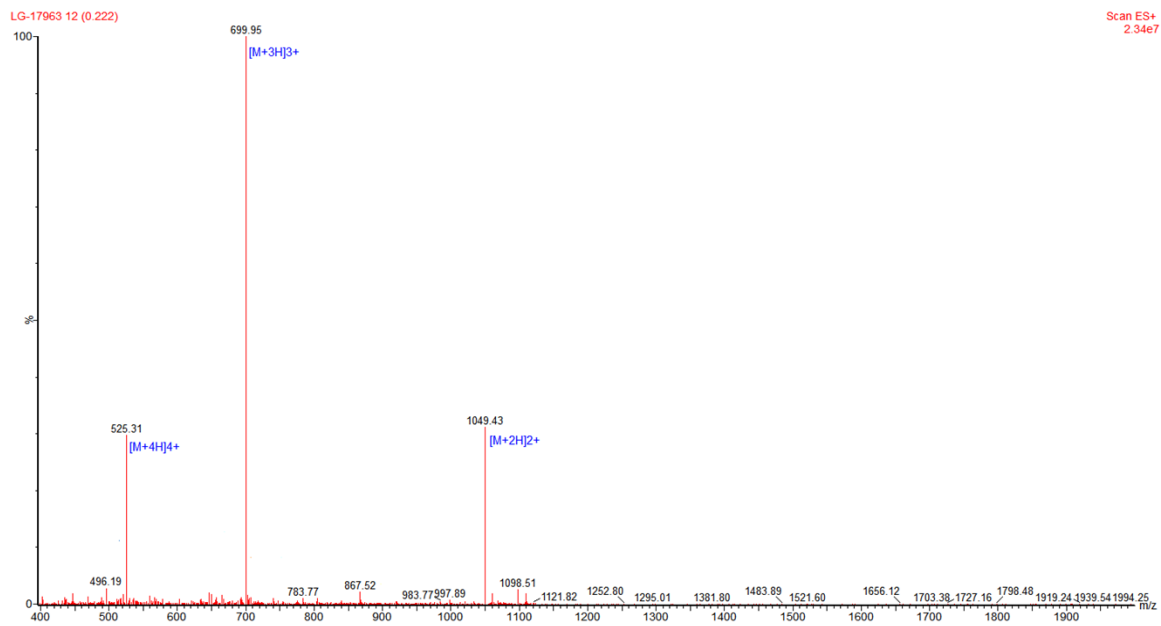

**Figure S5.** HPLC profile and MS analysis of P2.

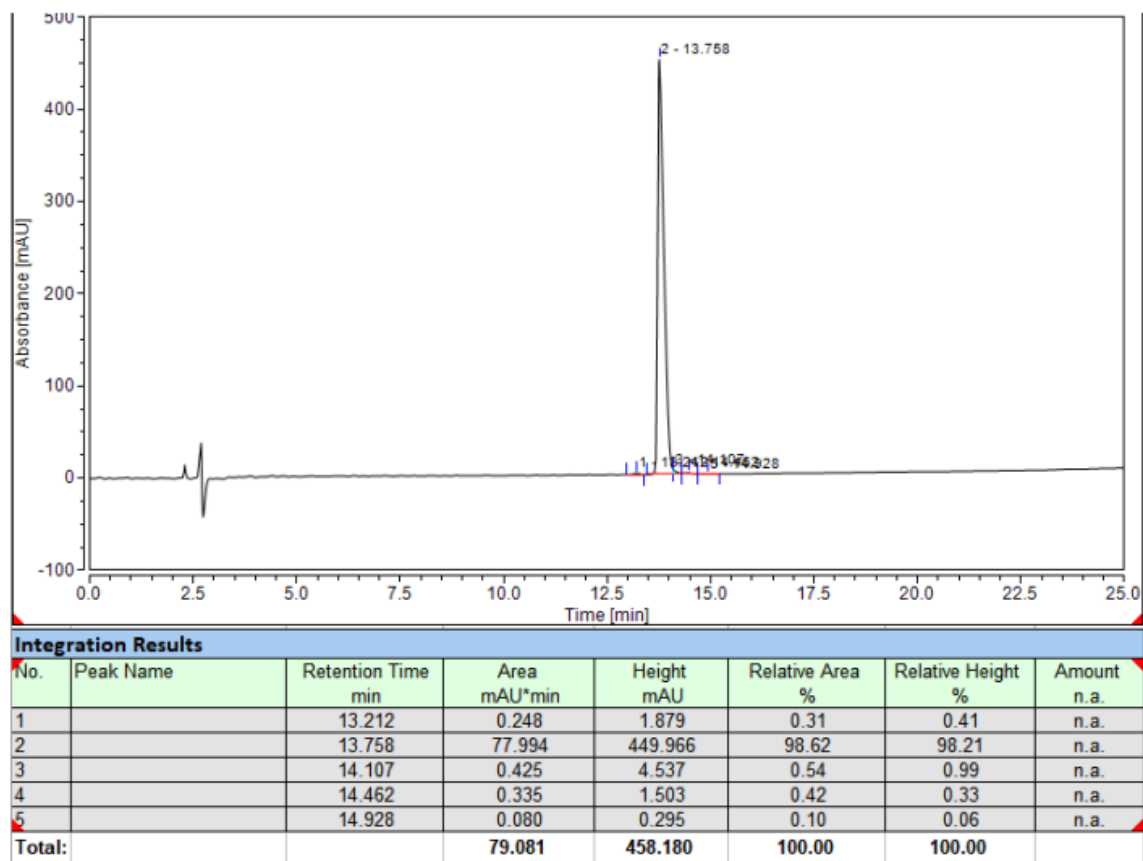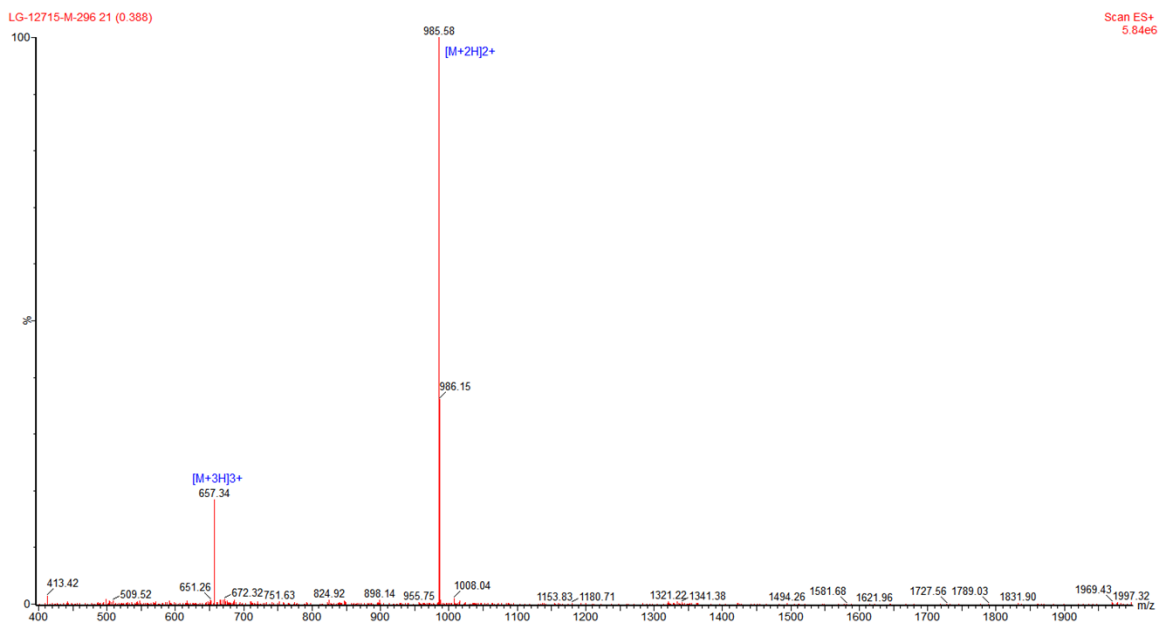

**Figure S6.** HPLC profile and MS analysis of P3.

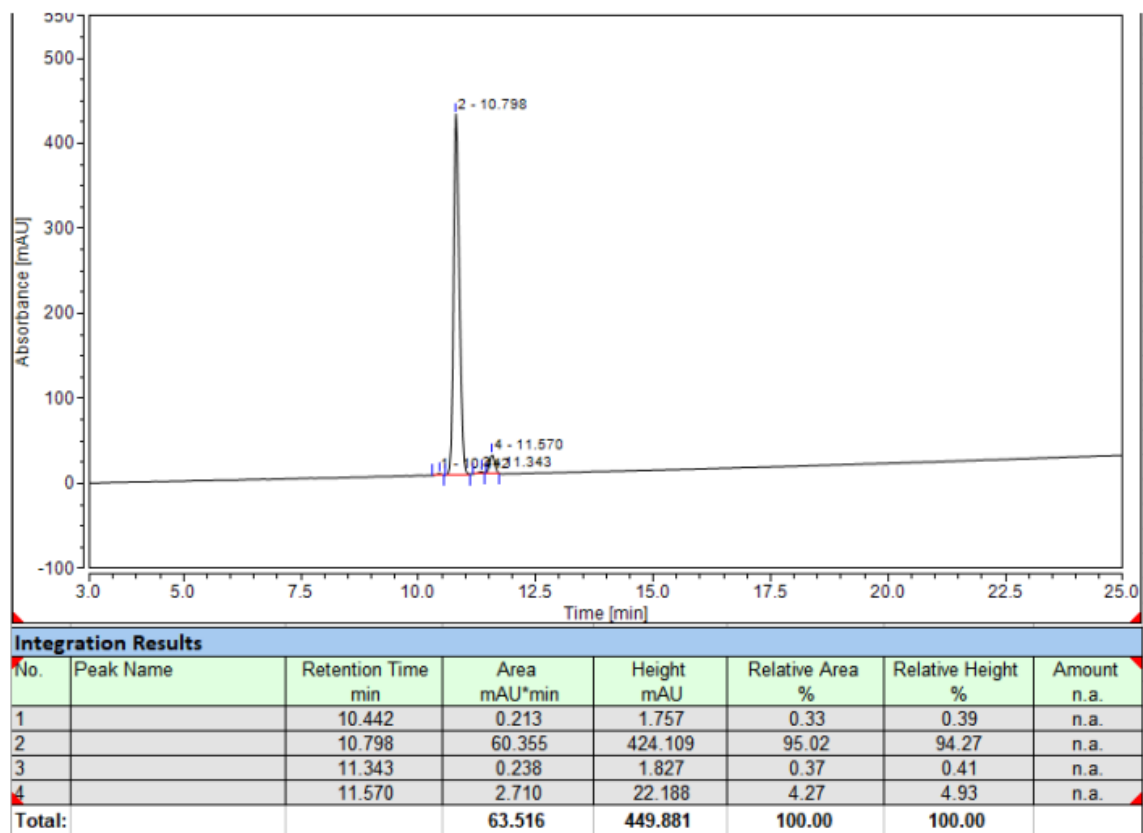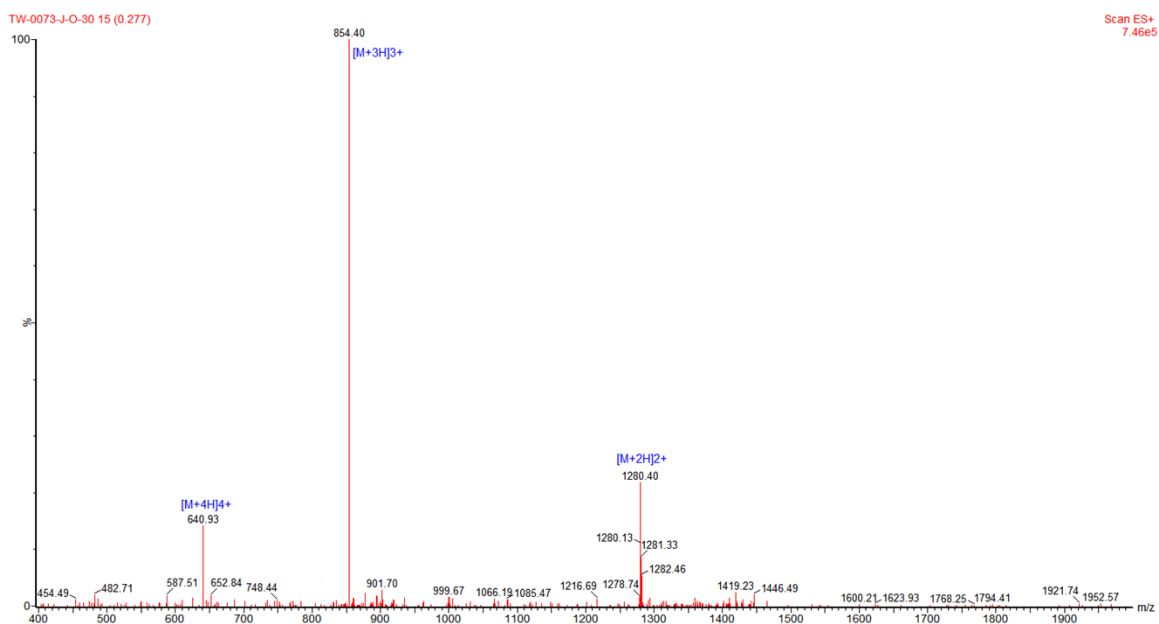

Figure S7. Zeta-potential of P1, P2 and P3.

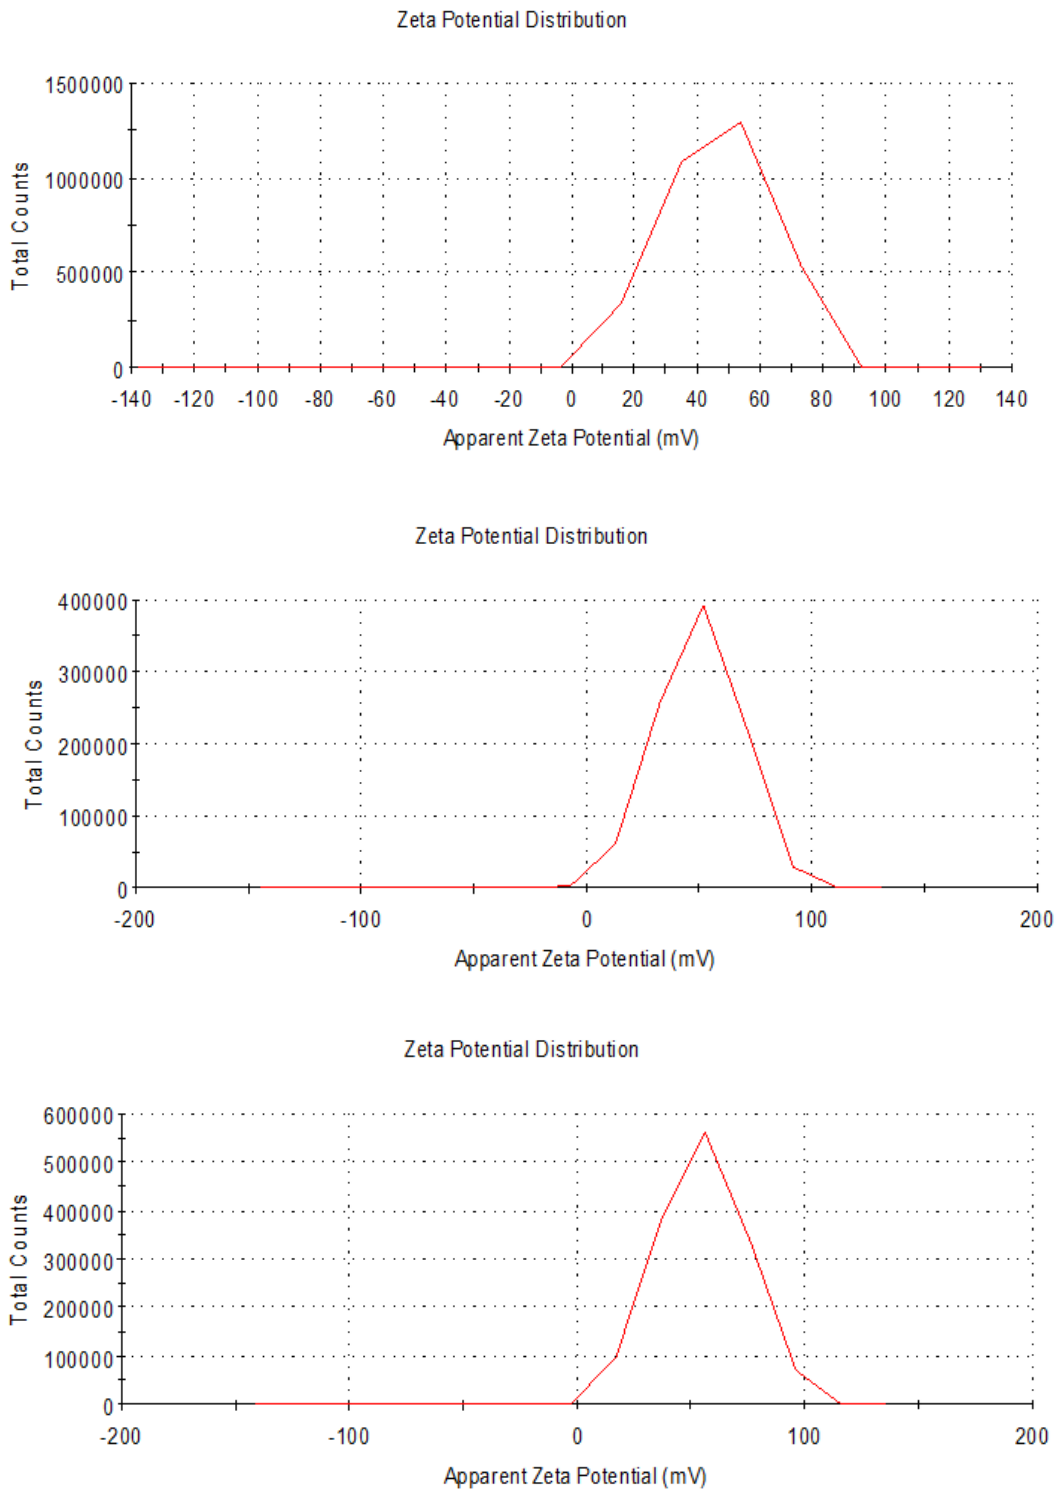

**Figure S8.** FTIR spectra of P1, P2 and P3.

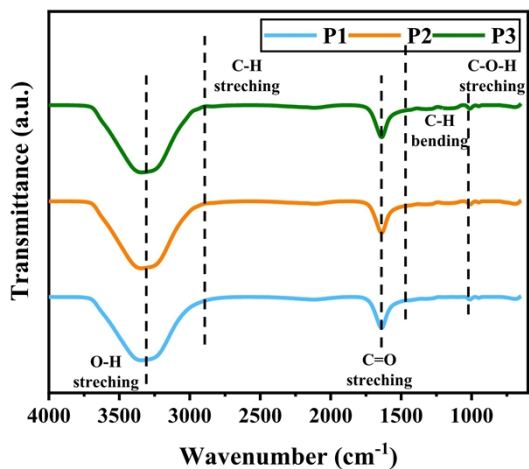

**Figure S9.** Encapsulation, drug loading and drug leakage efficiencies of P1 and P2.

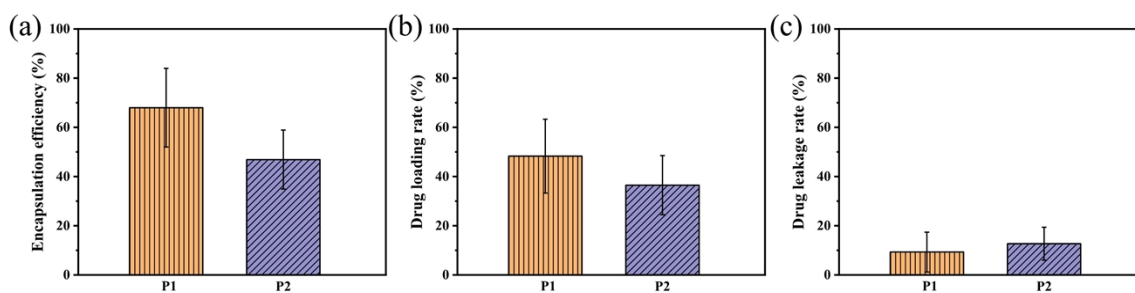

**Figure S10.** Encapsulation, drug loading and drug leakage efficiencies of P3.

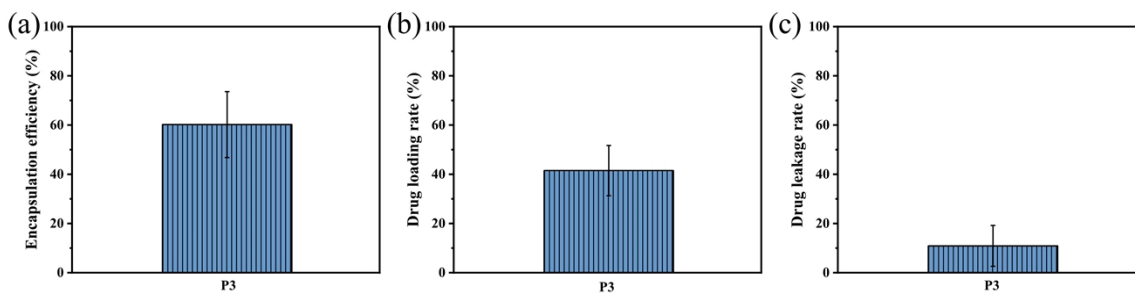

**Figure S11.** Viability of RAW264.7/HUVEC cells.

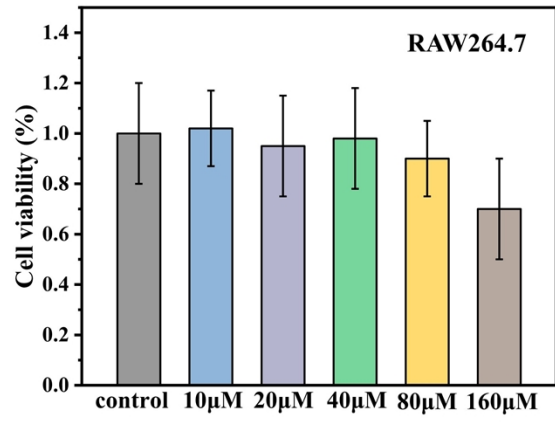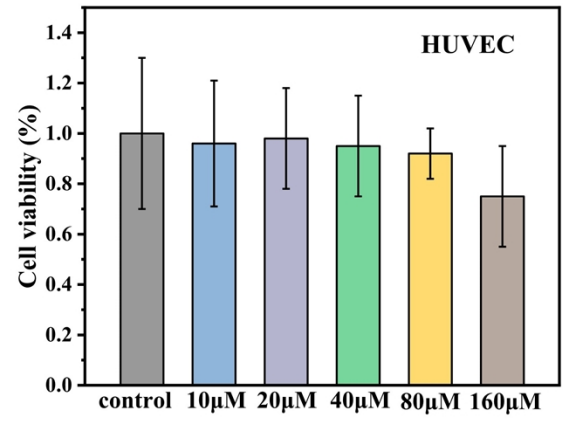

Supplement: d4bm00367e1.pdf [file d4bm00367e1.pdf]
